# Supplementary material for: Transcriptome dynamics in early in vivo developing and in vitro produced porcine embryos
Source: PubMed Central journal article supplement (PMC7913449; doi:10.1186/s12864-021-07430-7), 2021-02-27

Additional file 2: cDNA profiles and library smear analysis

**Porcine embryos cDNA profiles**

*In vivo* 4-cell embryo

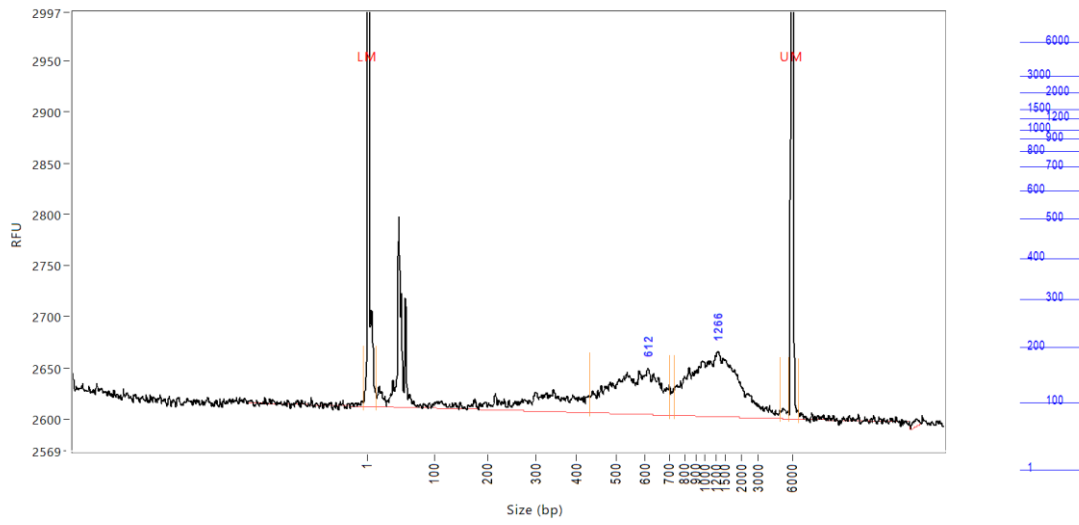

*In vitro* 4-cell embryo

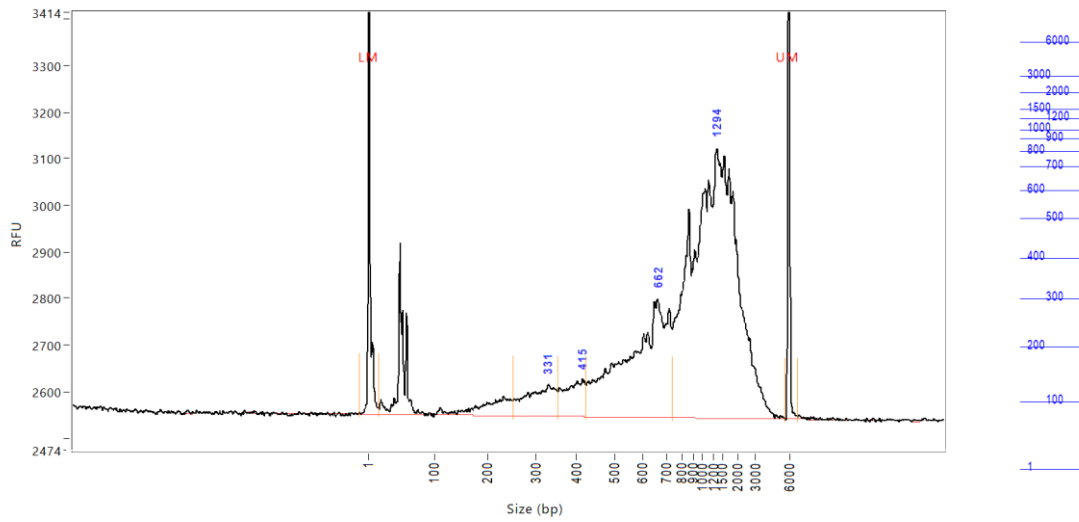

## Additional file 2: cDNA profiles and library smear analysis

### *In vivo* morula

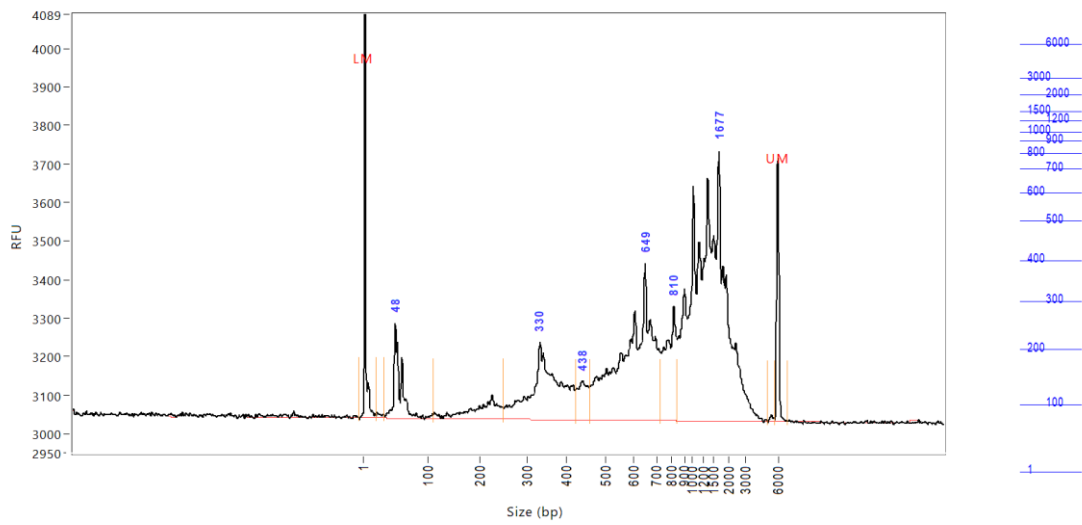

### *In vitro* morula

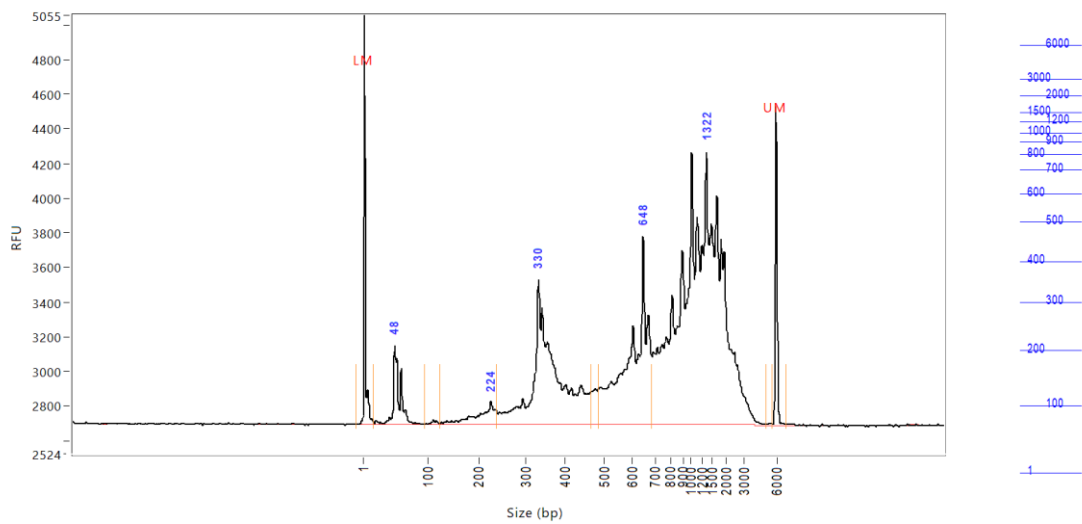

## Additional file 2: cDNA profiles and library smear analysis

### *In vivo* hatched blastocyst

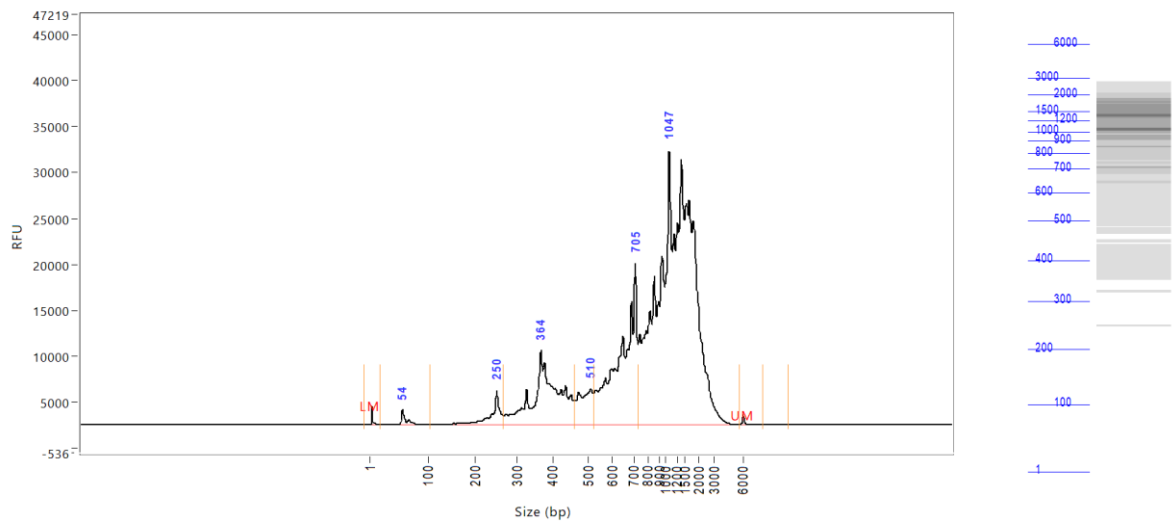

### *In vitro* hatched blastocyst

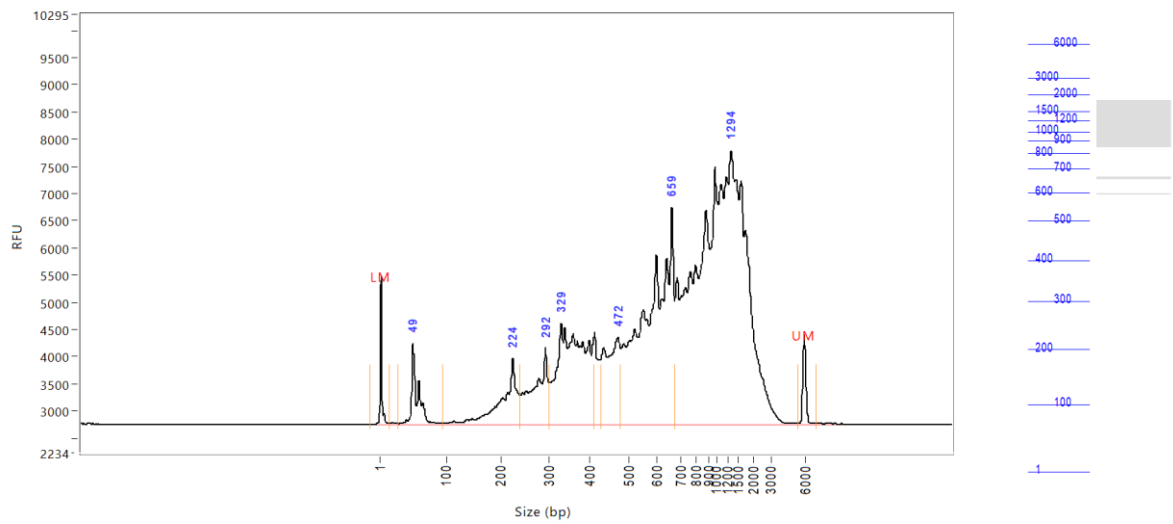

Additional file 2: cDNA profiles and library smear analysis

**Porcine embryos library smear analysis**

*In vivo* 4-cell embryo

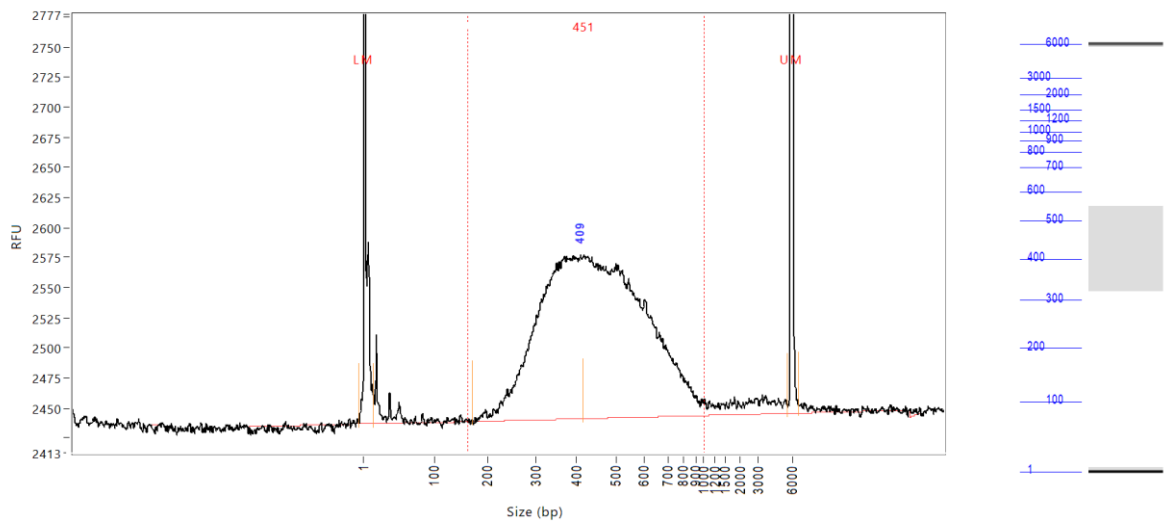

*In vitro* 4-cell embryo

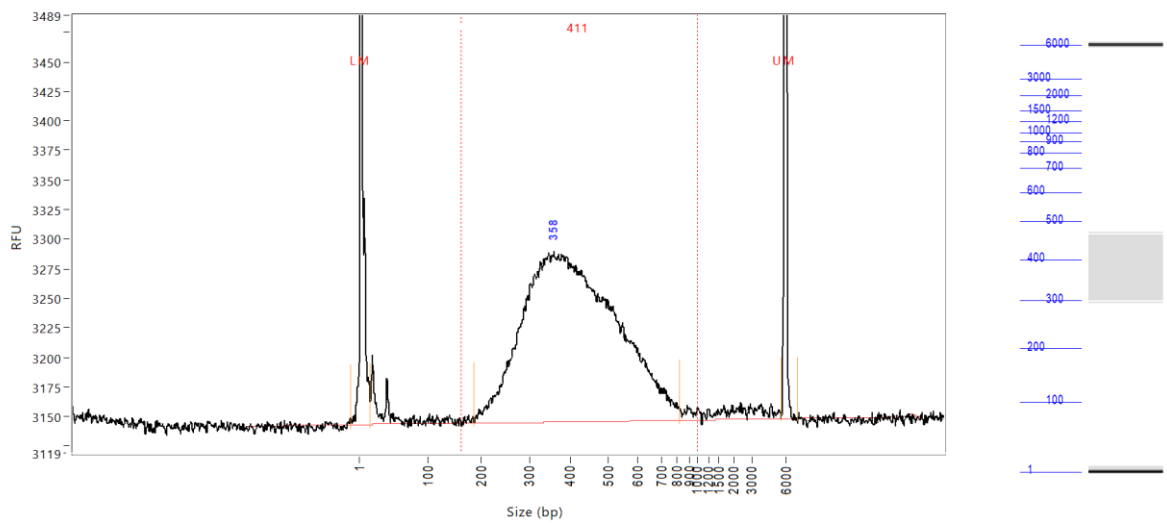

## Additional file 2: cDNA profiles and library smear analysis

### *In vivo* morula

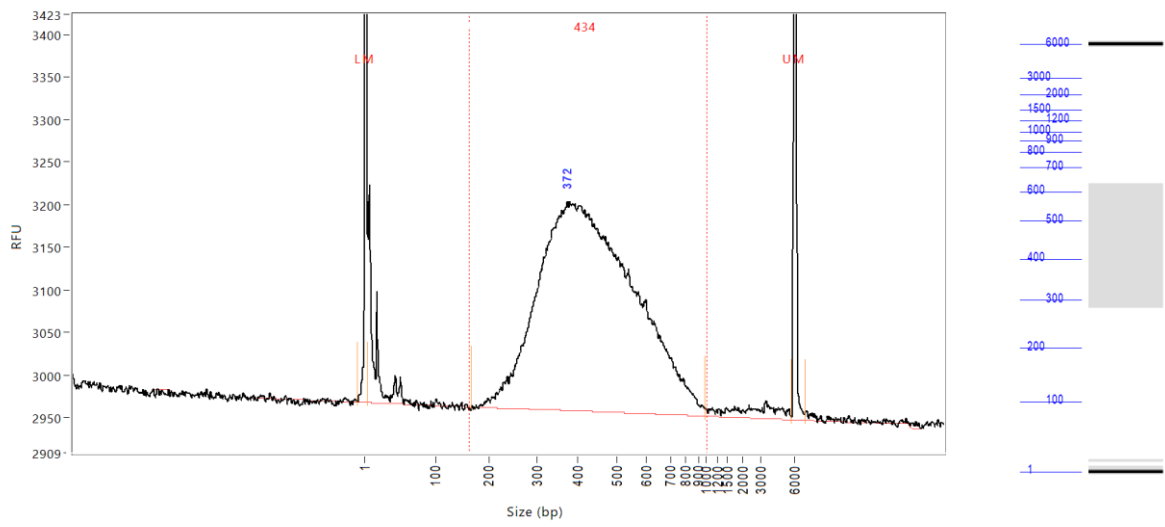

### *In vitro* morula

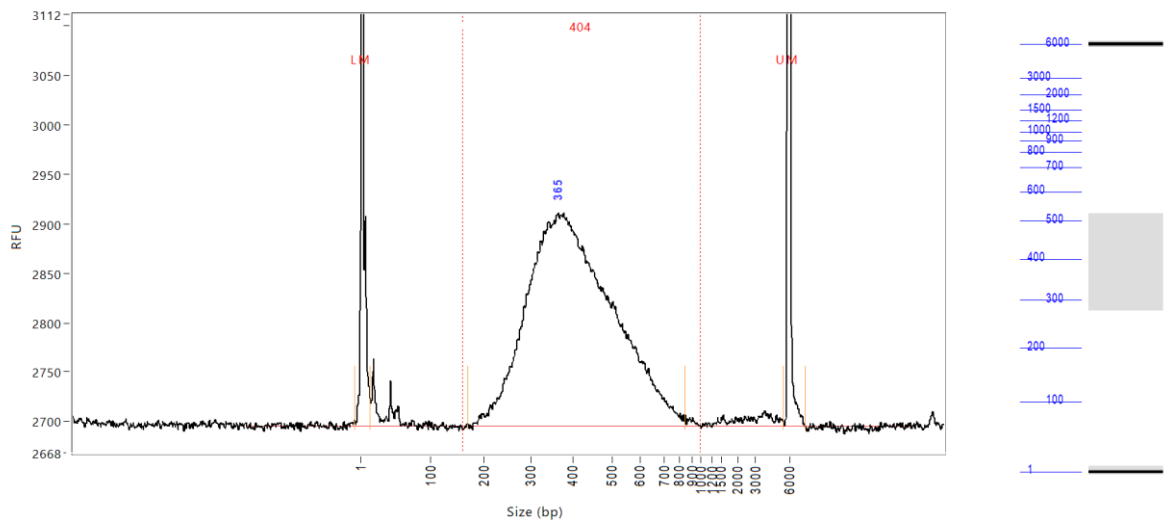

## Additional file 2: cDNA profiles and library smear analysis

### *In vivo* hatched blastocyst

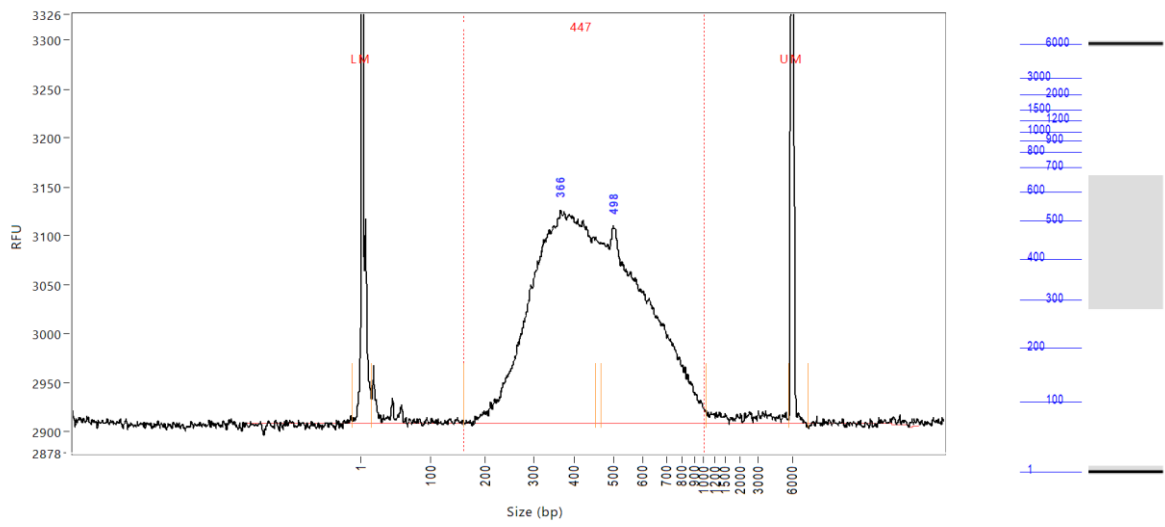

### *In vitro* hatched blastocyst

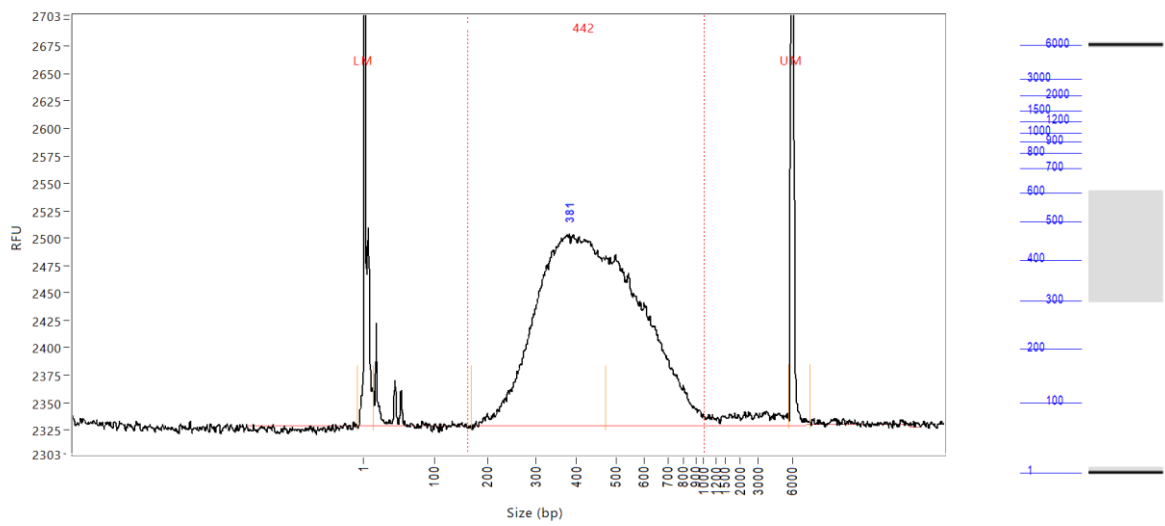

Supplement: 12864_2021_7430_MOESM2_ESM.pdf [file 12864_2021_7430_MOESM2_ESM.pdf]
