# Supplementary material for: Transcriptome dynamics in early in vivo developing and in vitro produced porcine embryos
Source: PubMed Central journal article supplement (PMC7913449; doi:10.1186/s12864-021-07430-7), 2021-02-27
Supplement: 12864_2021_7430_MOESM1_ESM.pdf [file 12864_2021_7430_MOESM1_ESM.pdf]

Additional file 1: Embryonically detected transcripts

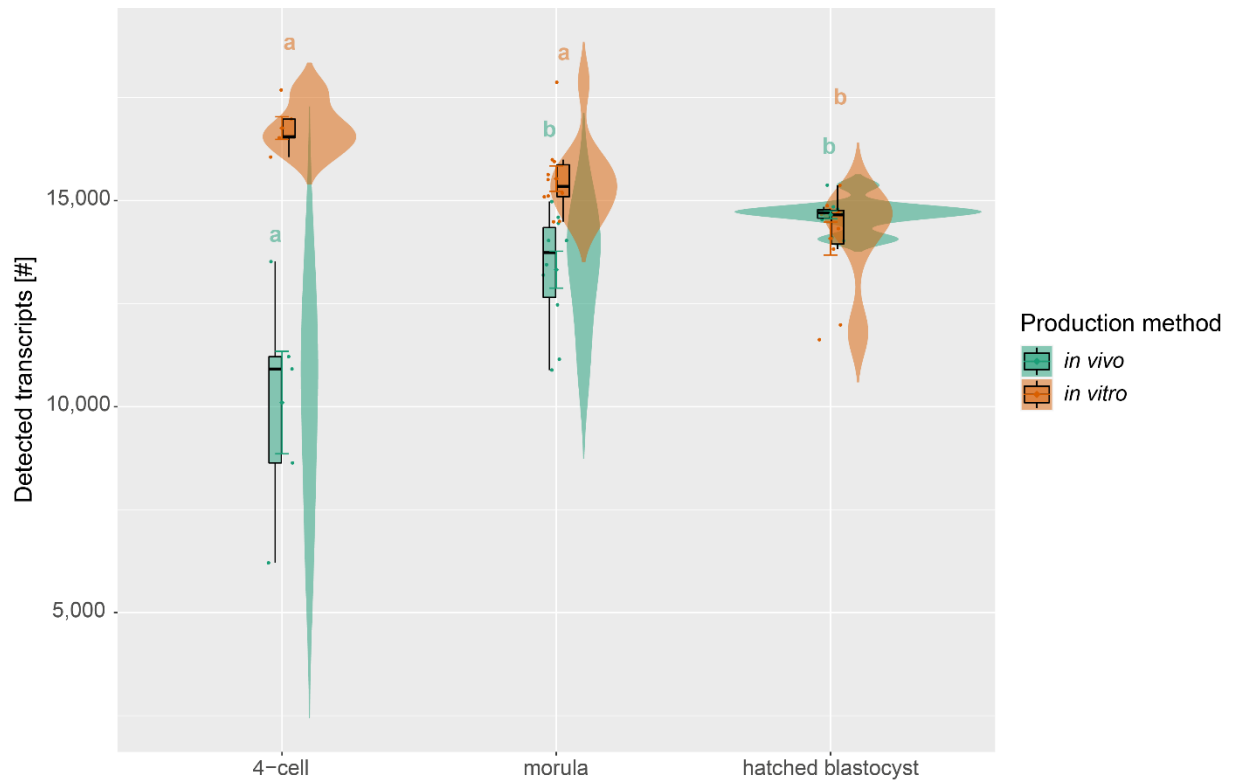

**Additional file 1.** Embryonically detected transcripts. The detected transcripts for each developmental stage and production method are displayed as violin plot, boxplot and individual data points. Letters in the graph indicate statistically significant differences ( $p < 0.05$ ) between the developmental stages for each production method.
