# Supplementary material for: Transcriptome dynamics in early in vivo developing and in vitro produced porcine embryos
Source: PubMed Central journal article supplement (PMC7913449; doi:10.1186/s12864-021-07430-7), 2021-02-27

Additional file 3: read alignment coverage

Alignment coverage 4-cell embryos

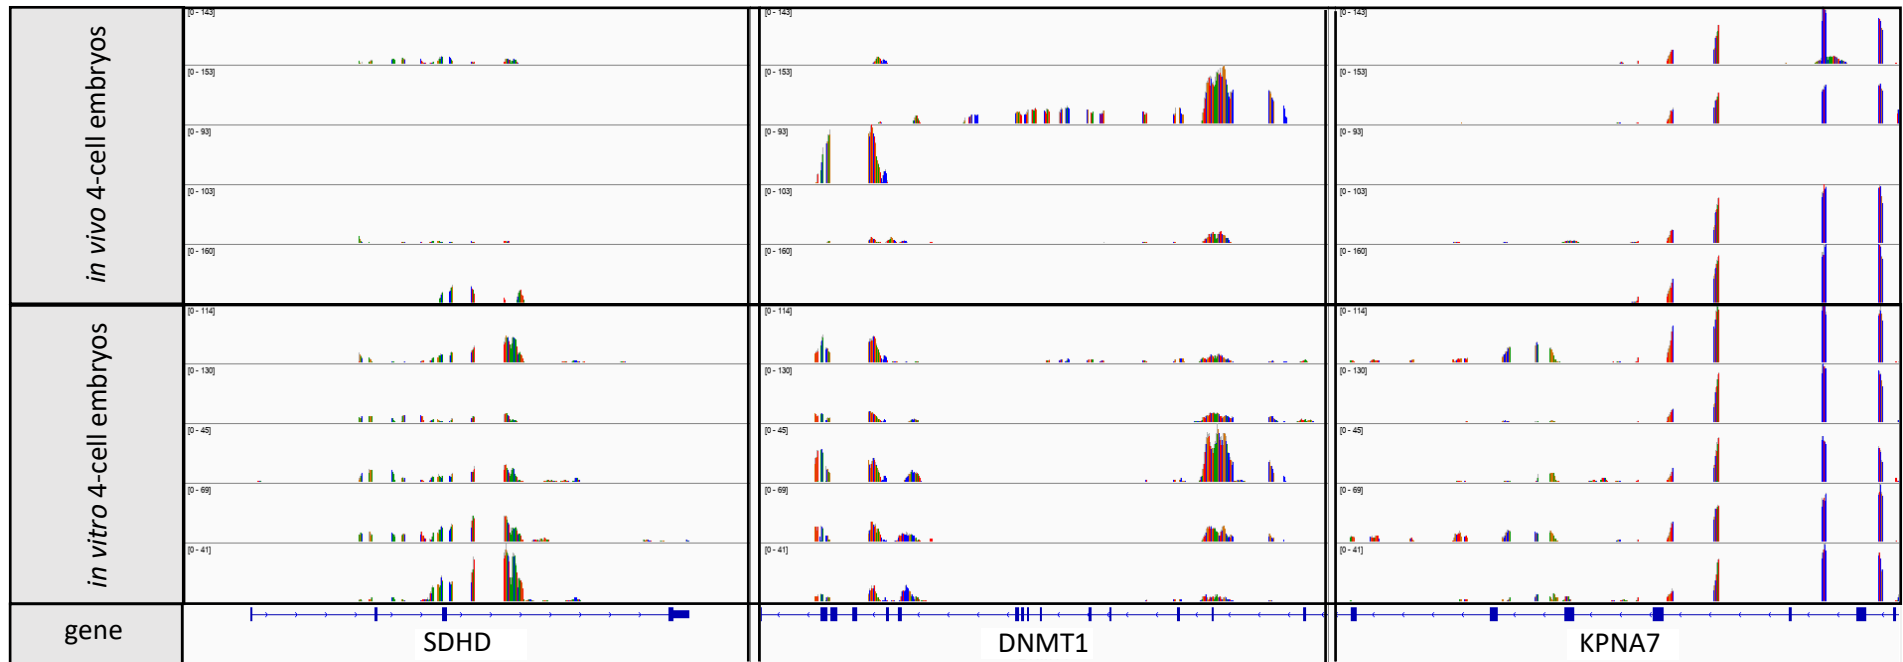

Additional file 3: read alignment coverage

Alignment coverage morulae

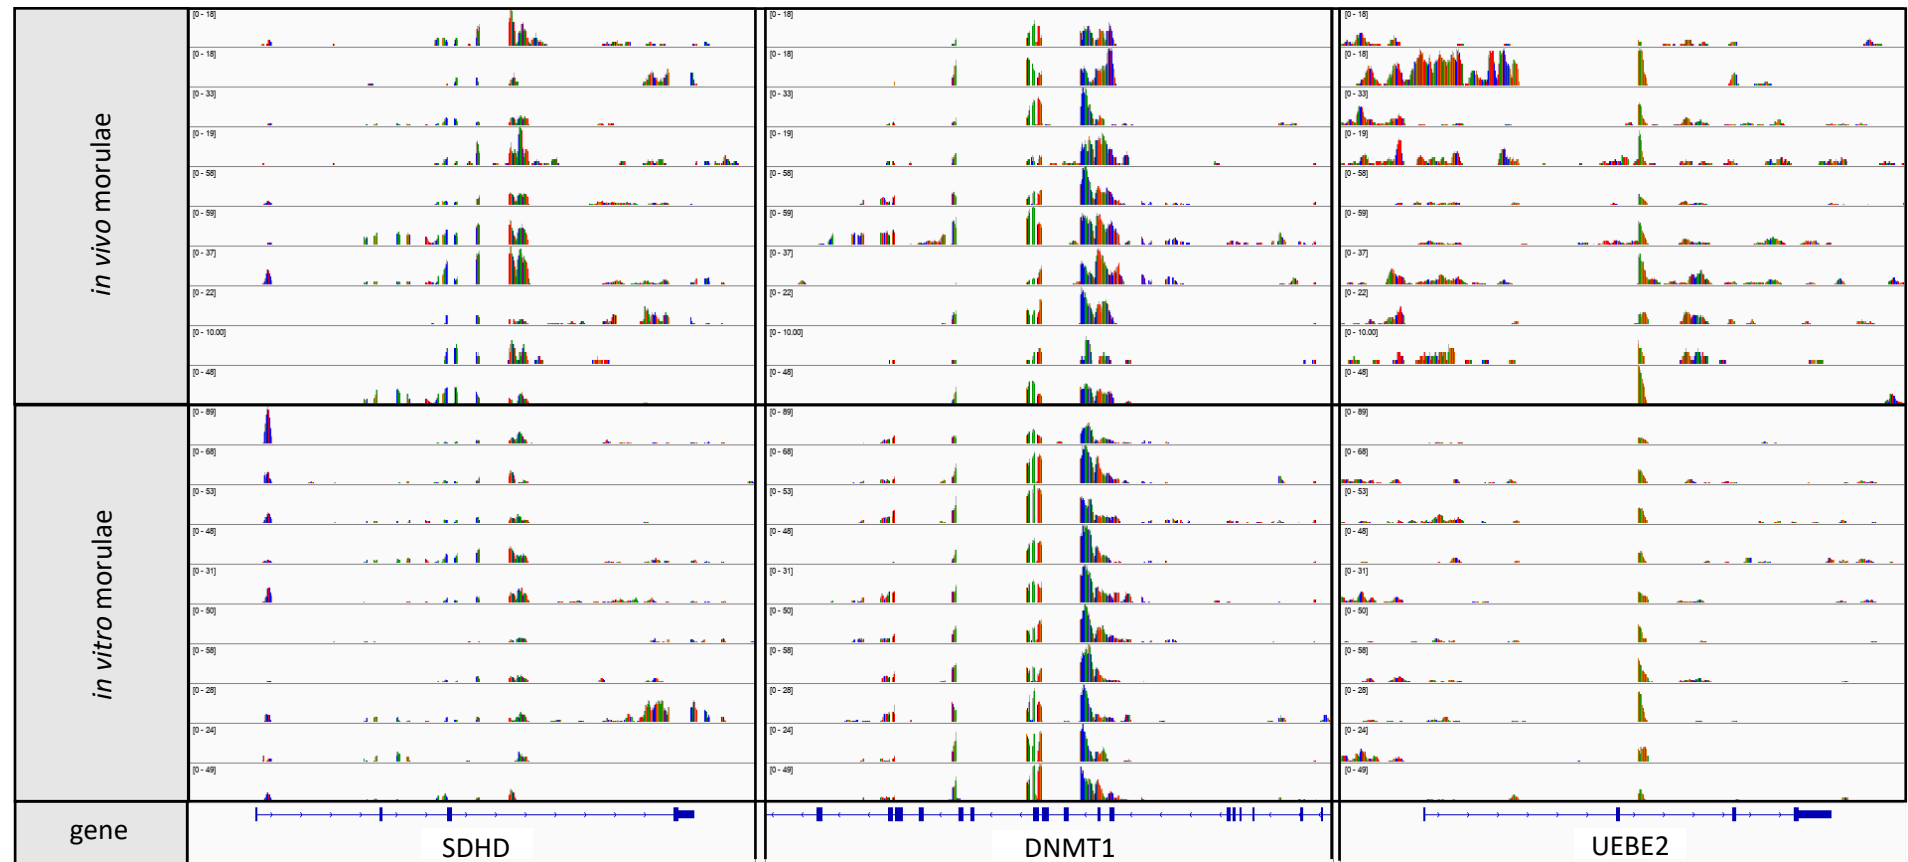

Additional file 3: read alignment coverage

Alignment coverage hatched blastocysts

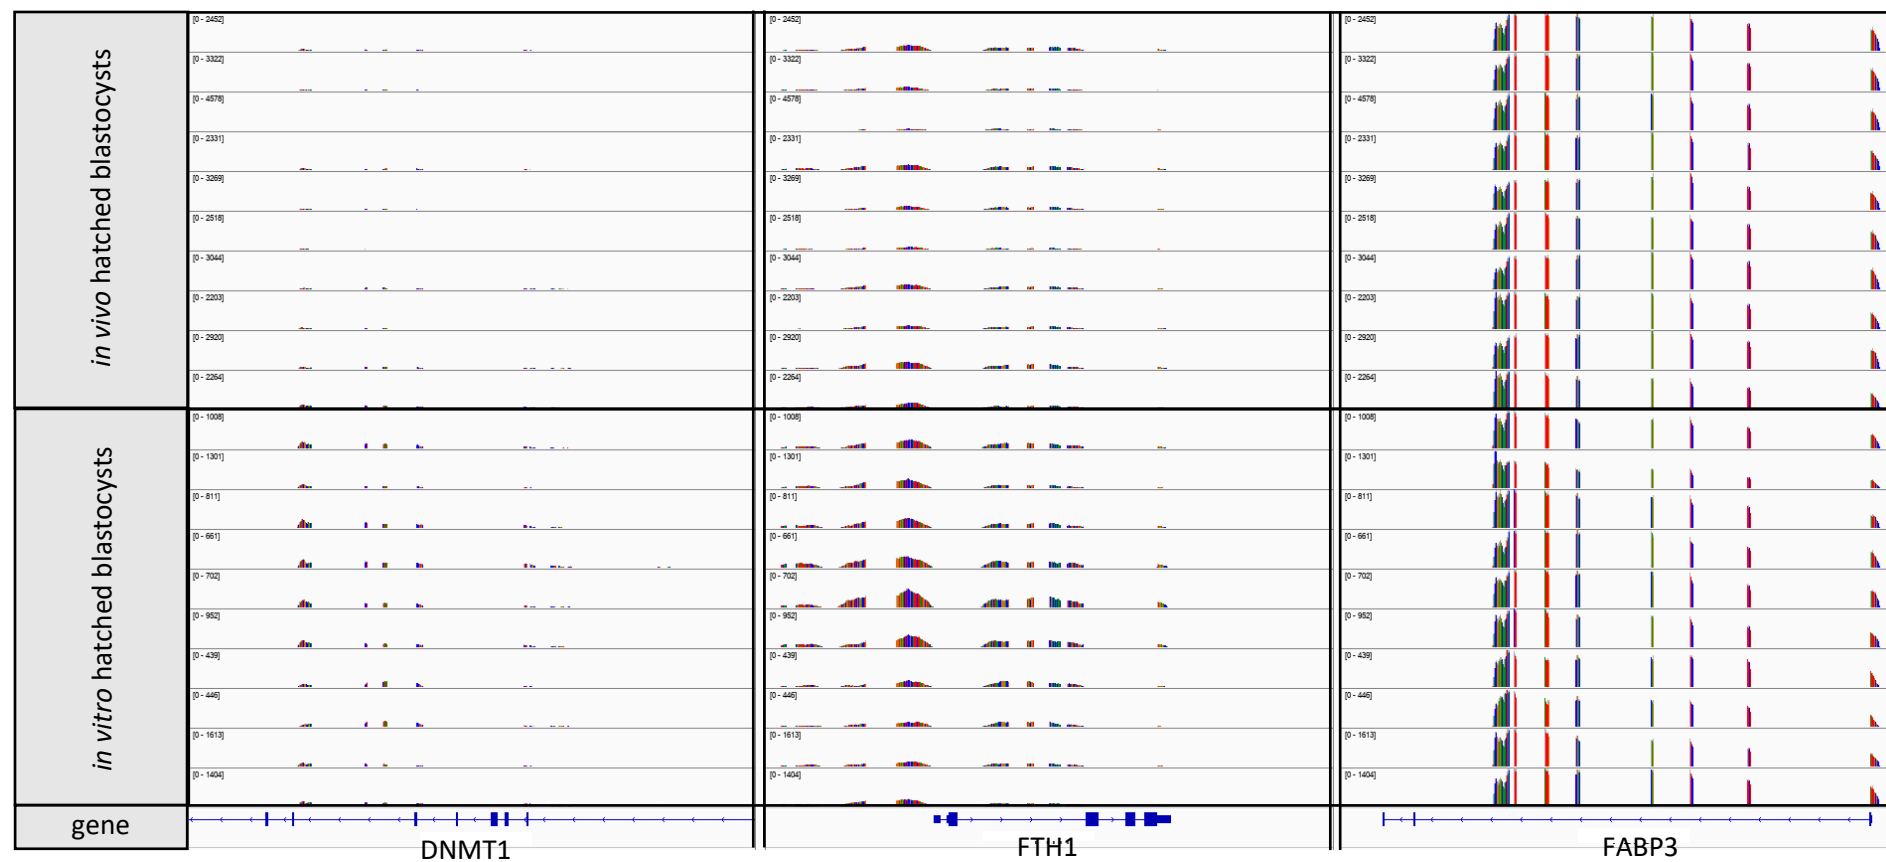

Supplement: 12864_2021_7430_MOESM3_ESM.pdf [file 12864_2021_7430_MOESM3_ESM.pdf]
